# Supplementary material
Source: PubMed Central journal article supplement (PMC2117074)
Supplement: thorax_thx.2006.064063_1.pdf [file thorax_thx.2006.064063_1.pdf]

| <b>Table S1. Comparisons of baseline parameters between patients who completed the study (n=46) and those who did not (n=10)</b> |                             |                              |                |
|----------------------------------------------------------------------------------------------------------------------------------|-----------------------------|------------------------------|----------------|
|                                                                                                                                  | <b>Completed<br/>(n=46)</b> | <b>Incomplete<br/>(n=10)</b> | <b>P value</b> |
| Male / Female                                                                                                                    | 37 / 9                      | 6 / 4                        | 0.218†         |
| Age (years)                                                                                                                      | 50.8 (1.3)                  | 50.7 (2.4)                   | 0.984          |
| Neck circumference (cm)                                                                                                          | 38.7 (0.4)                  | 37.5 (1.3)                   | 0.275          |
| Waist circumference (cm)                                                                                                         | 94.5 (1.5)                  | 92.3 (3.4)                   | 0.535          |
| Body mass index (kg/m <sup>2</sup> )                                                                                             | 27.2 (0.5)                  | 27.2 (1.2)                   | 0.995          |
| Score of ESS                                                                                                                     | 10.7 (0.7)                  | 13.1 (1.7)                   | 0.176          |
| Smoking status                                                                                                                   |                             |                              |                |
| Never                                                                                                                            | 35                          | 8                            | 0.910*         |
| Quit                                                                                                                             | 7                           | 1                            |                |
| Current                                                                                                                          | 4                           | 1                            |                |
| Alcoholic consumption                                                                                                            |                             |                              |                |
| Never                                                                                                                            | 27                          | 7                            | 0.647*         |
| Quit                                                                                                                             | 3                           | 1                            |                |
| Current                                                                                                                          | 16                          | 2                            |                |
| Hypertension                                                                                                                     |                             |                              |                |
| Yes                                                                                                                              | 24                          | 4                            | 0.623†         |
| No                                                                                                                               | 22                          | 6                            |                |
| Apnea-hypopnea index (events/hr)                                                                                                 | 30.2 (2.4)                  | 35.8(5.7)                    | 0.337          |
| Minimum SaO <sub>2</sub> (%)                                                                                                     | 75.3 (2.1)                  | 71.2 (4.5)                   | 0.407          |
| Mean SaO <sub>2</sub> (%)                                                                                                        | 93.7 (0.4)                  | 93.3 (0.8)                   | 0.697          |
| Arousal index                                                                                                                    | 33.1 (2.5)                  | 25.5 (7.0)                   | 0.235          |
| SaO <sub>2</sub> <90 (TST %)                                                                                                     | 9.6 (2.8)                   | 3.5 (2.8)                    | 0.318          |
| Total sleep time (min)                                                                                                           | 384.7 (18.6)                | 400.9 (28.4)                 | 0.704          |
| Sleep efficiency (%)                                                                                                             | 76.6 (3.4)                  | 86.6 (11.8)                  | 0.796          |
| Mean 24 hr BP (mmHg)                                                                                                             |                             |                              |                |
| Systolic                                                                                                                         | 124.0 (2.1)                 | 122.7 (2.4)                  | 0.787          |
| Diastolic                                                                                                                        | 81.1 (1.5)                  | 74.1 (2.0)                   | 0.748          |
| MAP                                                                                                                              | 95.3 (1.5)                  | 98.7 (2.0)                   | 0.767          |
| Wake time BP                                                                                                                     |                             |                              |                |
| Systolic                                                                                                                         | 128.4 (2.1)                 | 128.4 (2.1)                  | 0.490          |
| Diastolic                                                                                                                        | 83.9 (1.4)                  | 82.2 (2.4)                   | 0.591          |
| MAP                                                                                                                              | 98.5 (1.5)                  | 96.4 (2.3)                   | 0.533          |
| Sleep time BP                                                                                                                    |                             |                              |                |
| Systolic                                                                                                                         | 116.0 (2.4)                 | 114.3 (2.9)                  | 0.656          |
| Diastolic                                                                                                                        | 75.2 (1.7)                  | 73.0 (1.2)                   | 0.288          |
| MAP                                                                                                                              | 89.4 (1.8)                  | 87.5 (1.5)                   | 0.412          |

Values are expressed as mean (SE).

\* $\chi^2$  test; †Fisher's exact test.

MAP= mean arterial blood pressure.

**Table S2 Comparisons of changes in 24 hour BP parameters in mean (SE) with 95% CI over 3 months between therapeutic CPAP and subtherapeutic CPAP patients with hypertension**

|                                | <b>CPAP with hypertension (n=15)</b> | <b>Subtherapeutic CPAP with hypertension (n=9)</b> | <b>p-value</b> | <b>95% CI of the difference in BP changes</b> |
|--------------------------------|--------------------------------------|----------------------------------------------------|----------------|-----------------------------------------------|
| Mean sleep time blood pressure | -5.3 (2.7)                           | 0.1 (4.2)                                          | 0.275          | (-15.4 to 4.6)                                |
| Systolic                       | -3.6 (2.1)                           | -1.3 (3.2)                                         | 0.533          | (-9.8 to 5.2)                                 |
| Diastolic                      | -3.6 (2.1)                           | -0.7 (3.1)                                         | 0.424          | (-10.5 to 4.6)                                |
| MAP                            |                                      |                                                    |                |                                               |
| Mean daytime blood pressure    |                                      |                                                    |                |                                               |
| Systolic                       | -3.5 (2.8)                           | 1.3 (3.8)                                          | 0.304          | (-14.5 to 4.7)                                |
| Diastolic                      | -2.9 (1.6)                           | -0.5 (2.2)                                         | 0.383          | (-8.0 to 3.2)                                 |
| MAP                            | -3.0 (1.8)                           | 0.1 (2.8)                                          | 0.338          | (-9.5 to 3.4)                                 |
| Mean 24 hour blood pressure    |                                      |                                                    |                |                                               |
| Systolic                       | -3.8 (2.7)                           | 4.8 (3.2)                                          | 0.056          | (-17.5 to 0.2)                                |
| Diastolic                      | -3.2 (1.6)                           | 1.5 (1.9)                                          | 0.077          | (-10.0 to 0.6)                                |
| MAP                            | -3.5 (1.8)                           | 2.2 (2.2)                                          | 0.068          | (-11.7 to 0.5)                                |

**Table S3 Comparisons of changes in 24 hour BP parameters in mean (SE) with 95% CI over 3 months between therapeutic CPAP patients with hypertension and therapeutic CPAP patients with normotension**

|                                | <b>CPAP with hypertension<br/>(n=15)</b> | <b>CPAP with normotension<br/>(n=8)</b> | <b>p-value</b> | <b>95% CI of the difference in BP changes</b> |
|--------------------------------|------------------------------------------|-----------------------------------------|----------------|-----------------------------------------------|
| Mean sleep time blood pressure |                                          |                                         |                |                                               |
| Systolic                       | -5.3 (2.7)                               | -1.9 (3.3)                              | 0.457          | (-5.9 to 12.7)                                |
| Diastolic                      | -3.6 (2.1)                               | -1.7 (2.5)                              | 0.578          | (-5.1 to 9.0)                                 |
| MAP                            | -3.6 (2.1)                               | -3.4 (3.0)                              | 0.940          | (-7.3 to 7.8)                                 |
| Mean daytime blood pressure    |                                          |                                         |                |                                               |
| Systolic                       | -3.5 (2.8)                               | 0.2 (2.5)                               | 0.328          | (-4.0 to 11.4)                                |
| Diastolic                      | -2.9 (1.6)                               | -0.3 (1.6)                              | 0.312          | (-2.6 to 7.7)                                 |
| MAP                            | -3.0 (1.8)                               | -0.0 (1.8)                              | 0.298          | (-2.8 to 8.6)                                 |
| Mean 24 hour blood pressure    |                                          |                                         |                |                                               |
| Systolic                       | -3.8 (2.7)                               | 0.5 (1.8)                               | 0.198          | (-2.4 to 11.0)                                |
| Diastolic                      | -3.2 (1.6)                               | -1.0 (1.4)                              | 0.359          | (-2.8 to 7.4)                                 |
| MAP                            | -3.5 (1.8)                               | -0.5 (1.5)                              | 0.304          | (-2.8 to 8.7)                                 |

**Table S4 Comparisons of changes in 24 hour BP parameters in mean (SE) with 95% CI over 3 months between subtherapeutic CPAP patients with hypertension and those with normotension**

|                                | <b>Subtherapeutic CPAP with hypertension (n=9)</b> | <b>Subtherapeutic CPAP with normotension (n=14)</b> | <b>p-value</b> | <b>95% CI of the difference</b> |
|--------------------------------|----------------------------------------------------|-----------------------------------------------------|----------------|---------------------------------|
| Mean sleep time blood pressure |                                                    |                                                     |                |                                 |
| Systolic                       | 0.1 (4.2)                                          | 3.5 (1.2)                                           | 0.458          | (-6.5 to 13.3)                  |
| Diastolic                      | -1.3 (3.2)                                         | 2.3 (0.9)                                           | 0.311          | (-3.9 to 11.0)                  |
| MAP                            | -0.7 (3.1)                                         | 2.5 (1.1)                                           | 0.352          | (-4.1 to 10.4)                  |
| Mean daytime blood pressure    |                                                    |                                                     |                |                                 |
| Systolic                       | 1.3 (3.8)                                          | -0.4 (2.3)                                          | 0.688          | (-10.4 to 7.0)                  |
| Diastolic                      | -0.5 (2.2)                                         | -0.1 (1.6)                                          | 0.866          | (-5.2 to 6.1)                   |
| MAP                            | 0.1 (2.8)                                          | 0.2 (1.8)                                           | 0.957          | (-6.4 to 6.8)                   |
| Mean 24 hour blood pressure    |                                                    |                                                     |                |                                 |
| Systolic                       | 4.8 (3.2)                                          | -6.2 (7.4)                                          | 0.269          | (-30.9 to 9.1)                  |
| Diastolic                      | 1.5 (1.9)                                          | 0.8 (1.1)                                           | 0.751          | (-4.9 to 3.6)                   |
| MAP                            | 2.2 (2.2)                                          | 0.7 (1.2)                                           | 0.526          | (-6.3 to 3.3)                   |
